# Supplementary material for: Stabilizing XPbI3 (X = MA, FA and Cs) cubic perovskites by monolayer Ag4Se2 deposition
Source: Royal Society of Chemistry journal article supplement (doi:10.1039/d1nj04984d), 2021-12-07
Supplement: d1nj04984d1.pdf [file d1nj04984d1.pdf]

### Supplementary file

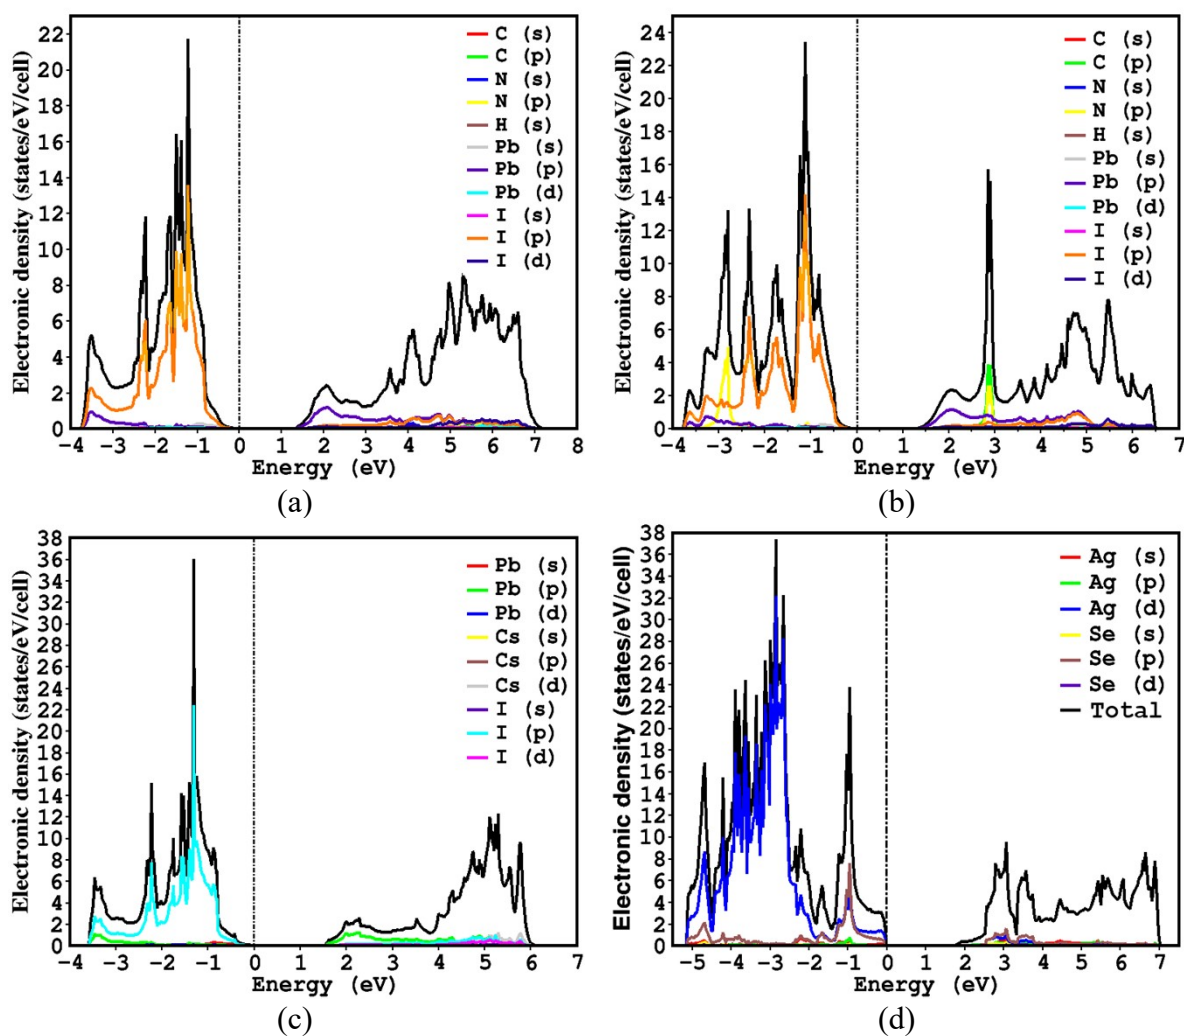

S1 Computed projected density of states (PDOS) for (a)  $\alpha$ -MAPbI<sub>3</sub>, (b)  $\alpha$ -FAPbI<sub>3</sub>, (c)  $\alpha$ -CsPbI<sub>3</sub> and (d) monolayer Ag<sub>4</sub>Se<sub>2</sub> phases.
